1 *Running title:* Oxidative stress and screening pigments in insect eyes

2

3

4

5 **OXIDATIVE STRESS, PHOTODAMAGE AND THE ROLE OF SCREENING**  
6 **PIGMENTS IN INSECT EYES**

7

8

9 Teresita C. Insausti, Marion Le Gall and Claudio R. Lazzari✉

10

11

12

13 Institut de Recherche sur la Biologie de l'Insecte, UMR 7261 CNRS - Université

14 François Rabelais, Tours, France

15

16

17

18 *Keywords:* compound eyes, ocelli, ommochromes, haematophagy, mutants

19

20

21

22

23

24 -----

25 ✉To whom all correspondence should be addressed:

26

Claudio R. Lazzari

27

Institut de Recherche sur la Biologie de l'Insecte

28

Faculté des Sciences et Techniques

29

Avenue Monge, Parc Grandmont

30

37200 Tours

31

France

32

E-mail: [claudio.lazzari@univ-tours.fr](mailto:claudio.lazzari@univ-tours.fr)

33

34

35 **ABSTRACT**

36

37           Using triatomine bugs (Hemiptera: Reduviidae) red-eyed mutants, we tested  
38 the hypothesis of an alternative function of insect screening pigments against  
39 oxidative stress. To test our hypothesis, we studied the morphological and  
40 physiological changes associated with the mutation. We found that wild-type eyes  
41 possess great amount of brown and red screening pigment inside the primary and  
42 secondary pigment cells as well as in the reticular cells. Red-eyed mutants, however,  
43 have only some scarce red granules inside the pigmentary cells. We then compared  
44 red-eyed mutants and wild-types visual sensitivity by measuring photonegative  
45 responses of insects reared in light/dark cycles (LD 12:12) or constant darkness (DD).  
46 Finally, we analyzed both the impact of oxidative stress associated with blood  
47 ingestion and photodamage of UV light on the eye retina. We found that red-eyed  
48 mutants reared in DD conditions were the most sensitive to the light intensities tested.  
49 Retinae of LD reared mutants were gradually damaged over the life cycle while for  
50 DD reared insects retinae were conserved intact. No retinal damages were observed  
51 on non-fed mutants exposed to UV lights for two weeks while insects fed on blood  
52 prior to UV exposition showed clear signs of retinal damage. Wild-type insects  
53 exposed to UV-light showed a marked increase in the amount and density of  
54 screening pigments.

55

56

57 **INTRODUCTION**

58

59 Mutations in eye color have been identified in several insect species and have  
60 been used as a marker in genetic studies or to follow different experimental  
61 populations. For instance, differences in eye color have been used to quantify the  
62 reproductive success of competing individuals by comparing the proportion of  
63 mutants to wild type in the offspring (Pires et al. 2002).

64 Mutants are also used as model systems for studies on the functional  
65 organization of visual systems. Indeed, eye color is given by screening pigments  
66 inside animal eyes, and, although in some species they may play a role in camouflage  
67 or in the protection against UV light photodamage, these pigments are mostly related  
68 to the visual function (Stavenga, 1989). Therefore, any modification of their nature or  
69 distribution, particularly their absence, may have important consequences on visual  
70 performance. In vertebrates and crustacean it has been suggested that screening  
71 pigments could also protect cells from the photo-oxidative damage derived from lipid  
72 peroxidation (Sakina et al., 1987; Ostrovsky et al., 1987; Dontsov et al., 1984;  
73 Dontsov et al, 1999). Such a function has, however, never been tested in the  
74 compound eyes of insects.

75 For different species mutations can differently affect parts the screening  
76 pigment synthesis pathway and consequences on visual sensitivity might differ.  
77 Despite the frequent use of eye color mutants in experiments, the morphological,  
78 physiological and behavioral consequences of such mutations remain unknown for  
79 most insects. The physiological and behavioral consequences of eye-color mutations  
80 have been studied in flies and honeybees and alterations in visual sensitivity were  
81 described (e.g. Hotta and Benzer, 1969; Gribakin and Chesnokova, 1982). Among  
82 hemimetabolous insects, such mutations have been reported in several species of  
83 triatomine bugs (Hemiptera: Reduviidae), red-eyed mutants being the most frequent.  
84 Red-eyed mutant bugs are a particularly interesting system model for studying the  
85 visual function for multiple reasons. First, these bugs are highly sensitive to light due  
86 to their nocturnal habits (Reisenman et al., 1998). Triatomine have a particular visual  
87 system, i.e. organisation of compound eyes and complexity of the ocellar system  
88 (Reisenman et al., 2002; Insausti and Lazzari, 2002). Additionally, they are  
89 hemimetabolous insects, making it possible to experiment on all stages throughout

90 life (6 to 12 months). Finally, they are obligatory haematophagous, throughout their  
91 entire life, which expose them to the oxidative stress derived from the heme group of  
92 the ingested blood (Vincent, 1989; Graça-Souza et al, 2006).

93 The goal of this study is to shed some light onto the role of screening  
94 pigments present in the insect eyes. Using two species of triatomine bugs, we  
95 investigated: 1) the morphological changes in the compound eyes and ocelli,  
96 associated to the red-eye mutation; 2) the visual sensitivity of mutants by comparison  
97 to wild-type insects; 3) the effect of light and blood ingestion on retinal cells; 4) the  
98 role of screening pigments.

99

100

## 101 **MATERIALS AND METHODS**

102

### 103 *Experimental animals*

104 Larvae and adults of red-eye mutants and wild type of *Triatoma infestans* and  
105 *Rhodnius prolixus* were used throughout their life cycle. The insects were reared in a  
106 laboratory colony at 26°C and fed weekly on heparin-treated sheep blood, through an  
107 artificial feeder (Núñez and Lazzari, 1990).

108 Provided that response to light, structure of compound eyes and ocelli, as well  
109 as pigment migration have been well characterized in *T. infestans* (Reisenman et al.,  
110 1998; Reisenman et al., 2002; Insausti and Lazzari, 2002; Lazzari et al., 1998;  
111 Lazzari et al., 2012), this species was chosen for studying the modification of eye  
112 structure associated to the red-eye mutation, the visual sensitivity of mutants and the  
113 impact of light exposition on the retina and visual performance.

114 *R. prolixus* is a classical model for the study of oxidative stress associated to  
115 blood ingestion (Graça-Souza et al, 2006; Caiaffa et al, 2010; Stiebler et al, 2010).  
116 For this reason, we used this species for analyzing the response of mutants and wild-  
117 type bugs to the exposition of photo and heme oxidative stress.

118 The wild type insects were maintained under 12:12 hours light/dark cycles  
119 along their whole life.

120 Red-eye mutants were maintained during their whole life (i.e. since eggs)  
121 either in permanent darkness or exposed to light/dark cycles (L:D 12 h:12 h, 140  
122 mW.cm<sup>-2</sup>).

123

124

125 *Eye morphology*

126 Larvae and adults of *T. infestans* and *R. prolixus* were analyzed. Light  
127 microscopy was performed on the insect heads following the procedure described  
128 previously (Reisenman et al., 2002). In brief, the posterior half of the head (containing  
129 the compound eyes and the ocelli) was fixed for 3-hours in a mixture of 2.5%  
130 glutaraldehyde and 2.0% paraformaldehyde in phosphate buffer (pH-7.3) with glucose  
131 and CaCl<sub>2</sub> added. After dehydration, they were embedded via propylene oxide in  
132 Durcupan ACM (Electron Microscopy Sciences no. 14040). Blocks were serially  
133 sectioned at 5-µm using glass knives mounted on a microtome. The sections were  
134 stained on a hot plate with 1% methylene blue and mounted on a slide with DPX  
135 (Electron Microscopy Sciences no. 13510).

136

137 *Visual sensitivity*

138 As an experimental paradigm for behavioral tests, we measured the  
139 photonegative response of both groups of mutants and of wild *T. infestans*  
140 (Reisenman et al., 1998).

141 The phototactic behavior of bugs was measured in a rectangular arena as done  
142 by Lazzari et al (1998). The arena (25 cm length x 5.5 cm width x 2.2 cm high), had  
143 filter paper for substrate and was covered with a rectangular piece of glass. Half of  
144 the arena was kept in the dark by means of a black cardboard fixed to the glass cover  
145 and the other half remained uncovered. The uncovered half was illuminated with an  
146 halogen (= white light source) (OSRAM 41860 WF, 12V/20W) located in an  
147 aluminum cylinder (diameter: 8 cm, height: 17 cm) that rested on top of a diffusing  
148 glass, 60 cm above the arena. The lamp was located above the right or left end of the  
149 arena in order to accentuate differences between dark and illuminated halves.

150 Neutral density filters (Melles Griot fused silica filters) were interposed to  
151 obtain a light intensity on the illuminated side of the arena of either 0.6 or 6 µW/cm<sup>2</sup>.  
152 Light intensity was measured with a radiometer (SEL 033 sensor module, IL 1400  
153 radiometer; International Light, Newburyport, MA, USA, provided with a  
154 photometric filter).

155 All of the experiments were done at 25 °C, and each bug was used in only one  
156 trial. Spatial asymmetries were avoided by interchanging areas between trials.

157 For each trial, a single bug was released. The insect was first placed within a  
158 small dark bowl in the dark end of the arena. After 40 seconds of rest, the bowl was  
159 carefully inverted and the trial started. Each trial lasted five minutes. The behavioral  
160 variable quantified was *Permanence time in darkness (%)*: total time (measured in  
161 seconds) spent in the dark half of the arena, expressed as percentage of the total time  
162 of the trial. Controls were tested in total darkness and permanence time was  
163 computed considering the side in which the insect was released (right or left).  
164 Experiments in total darkness were monitored with the aid of a night vision system  
165 provided with an IR illumination source (900nm), which light is not perceived by  
166 bugs (Reisenman et al., 1998).

167 Twenty wild-type or mutant individuals were tested by group. A two-way  
168 ANOVA was performed (normality and homocedasticity tests passed) in order to test  
169 the effect of light-intensity and the experimental group on the results.

170

#### 171 *The effect of blood ingestion and UV-exposition*

172 To analyze whether both types of oxidative pressure, i.e. light and heme, could  
173 have interactive effects, we compared the eyes of fed and unfed, wild-type and  
174 mutants exposed to UV light. This light was chosen because it imposed a stronger  
175 photo-oxidative stress than white light (Meyer-Rochow, 1994; Meyer-Rochow et al,  
176 2002). Groups of fifth-instar larvae of *R. prolixus* were exposed to  $31 \mu\text{W}\cdot\text{cm}^{-2}$  UV-  
177 light (Hanau Fluotest Typ 5301) or kept in darkness for two or four weeks. The  
178 intensity of UV light was chosen to be within the visual sensitivity of bugs, which  
179 range from  $0.05 \mu\text{W}\cdot\text{cm}^{-2}$  to  $115 \mu\text{W}\cdot\text{cm}^{-2}$  (Reisenman et al., 1998).

180 The analysis of the structure and condition of the eyes was conducted by means  
181 of histological preparations and light microscopy as described in the “*Eye*  
182 *morphology*” section above.

183

## 184 **RESULTS**

185

### 186 *Eye morphology*

187 On gross external inspection, the eye colour of wild individuals of both  
188 species analysed is dark brown, whereas the eyes of mutant insects are bright red  
189 (Fig. 1A-D). Compound eyes of wild individuals *T. infestans* and *R. prolixus* have  
190 been described by Reisenman et al. (2002) and by Müller (1970), respectively. These

191 bugs possess apposition compound eyes with open rhabdoms, in which a ring of six  
192 rhabdomeres (rh 1-6) from retinula cells 1–6 surrounds a central pair of rhabdomeres  
193 (rh 7-8) from retinula cells 7 and 8. The crystalline cone is surrounded by two  
194 primary pigment cells (PPC). Twenty-four secondary pigment cells (SPC) enclose  
195 each ommatidium. Dark granules of screening pigments are located not only in the  
196 pigment cells, but also inside all retinula cells. The rhabdomeres and most of the  
197 screening pigments are restricted to the distal half of the retinula cells; the proximal  
198 half is occupied by the nucleus, some pigments and clear globular structures, termed  
199 ‘sphaeroids’ (Figs. 2A, 3A, 4A, B, 7A, C). In the ocelli, large amount of pigment  
200 granules are found inside the retinal cells and in the outer ring of pigmentary cells  
201 (Insausti et al., 2002) (Fig. 5A).

202         When we studied mutant compound eyes, we observed a lack of screening  
203 pigments inside the retinular cells for both species. For *T. infestans*, we found red  
204 pigment granules inside the primary and secondary pigment cells. However, the  
205 amount of pigment found in the primary pigment cells was lower than for the wild  
206 bugs (Figs. 2B, 3B, 4C, D). We found similar results for *R. prolixus* secondary  
207 pigment cells but we found no pigment at all in the primary pigment cells for this  
208 species (Fig. 7C, D).

209         The analysis of postembryonic development of the eyes of *T. infestans*  
210 mutants kept under LD conditions showed intact retinular cells in first instar larvae  
211 (Fig. 2B). As the individuals grew, progressive cellular damage was observed.  
212 Consequently, damage was particularly severe in adults (Figs. 3C, 4E, F).

213         For mutants reared in complete darkness, no damage of the cellular structure  
214 was observed for larvae or adults (Figs. 3B, 4C, D).

215         Examination of the ocelli of red-eyes mutants (Fig. 5B) revealed the absence  
216 of pigment granules inside both, pigmentary and retinal cells. No cellular damage  
217 was observed in the ocellar retina for both treatments (light/dark cycle or kept in the  
218 darkness).

219

### 220 *Visual performance*

221         Figure 6 depicts the sensitivity to light of wild-type and mutant *T. infestans*,  
222 as revealed by the intensity of the photonegative response. Four groups were  
223 compared: 1) light-adapted wild-type bugs (i.e. dispersed screening pigments); 2)  
224 dark-adapted wild-type bugs (i.e. retracted screening pigments); 3) red-eye mutants

225 reared in DD (i.e. no screening pigments, intact retina) and 4) red-eye mutants reared  
226 in LD (i.e. no screening pigments, damaged retina). All groups reacted to light at both  
227 light intensities tested. The intensity of the response to light varied across groups as  
228 follows: mutant bugs reared under constant darkness > dark-adapted normal bugs >  
229 mutants reared in LD > light-adapted normal bugs.

230

### 231 *The effect of blood ingestion*

232 As for *T. infestans*, the red-eye of *R. prolixus* mutants unfed and kept in DD  
233 exhibits an ommatidial structure that only differs from wild-type insects by the  
234 absence of dark screening pigments (Fig. 7A-D).

235 For insects that were exposed two weeks to UV-light, the influence of blood  
236 feeding became evident. While non-fed insects did not exhibit any retinal damage  
237 when compared to DD-reared insects, mutants that were blood fed before UV  
238 exposition showed clear signs of retinal damage (Fig. 8 A, B). Feeding also affected  
239 wild-type insects. After two weeks of exposition to UV, unfed wild-type insects did  
240 not exhibit any noticeable change but, insects that were fed showed an increase in the  
241 relative amount of screening pigments (Figs. 8C, D). Finally, after a month of  
242 exposition to UV, for the red-eye bugs photodamage was evident, as shown in Fig. 9A.  
243 In wild-type insects however only a marked increase in the amount and density of  
244 screening pigments was observed (Fig. 9B).

245

246

## 247 **DISCUSSION**

248

### 249 *The nature of pigments*

250 The screening pigments present inside the pigment and retinula cells  
251 determine the color of insect eyes. These pigments belong to two chemical classes:  
252 ommochromes and pteridines (Langer, 1975). Pteridines are found in smaller  
253 amounts, they can be white, yellow and red (Langer, 1975). The nature of the  
254 ommochromes present in the secondary pigment cells may vary with the insect  
255 species. Some insects only have xanthommatin, while in others a mixture of  
256 xanthommatin and ommins is present. Xanthommatin can be present in an oxidized  
257 form (yellow-brown) or in a reduced form (red) (Langer, 1960; Linzen, 1967). The  
258 pigment granules containing ommins were described in the receptors cells and the



259 primary pigment cells (Langer, 1975). The eye-color mutants lack or have low  
260 amounts of one or more of these screening pigments (Summers et al., 1982).

261         Among triatomines, red-eye is the most frequent mutation. In wild-type *R.*  
262 *prolixus*, the presence of both ommins and xanthommatin has been reported  
263 (Butenandt et al., 1960; Linzen, 1974). In *T. infestans*, Moraes et al. (2005)  
264 concluded that xanthommatin is the only ommochrome present in both, wild and red-  
265 eyes insects. These authors excluded the presence of pteridines in the eyes of *T.*  
266 *infestans* and did not report the presence of ommins. They suggested that the red  
267 color of mutant eyes was caused by a smaller amount of xanthommatin compared to  
268 wild-type eyes. Our morphological analysis revealed that in *R. prolixus* and *T.*  
269 *infestans* the reticular cells of red-eyes mutants completely lacked pigments and  
270 pigment cells contained only red pigment granules. The amount of pigments inside  
271 the primary pigment cells of *T. infestans* mutants is lower than for wild-type bugs.  
272 We thus concluded that for the eyes of *T. infestans*, as previously reported for *R.*  
273 *prolixus*, two kinds of ommochromes are present. Ommins must be the dark pigment  
274 found inside the retinula cell and red xanthommatin the one present in the secondary  
275 pigment cells. In wild-type insect, a mixture of both must be present in the primary  
276 pigment cell. This way, if red-eye mutants lack dark ommins, xanthommatin will be  
277 the red pigment present in secondary cells and primary pigment cells. Since the ocelli  
278 of mutant insects lack screening pigments both inside retinal and pigmentary cells,  
279 we can state that the only pigment present in the wild-type ocelli should be ommins.  
280 A biochemical analysis is necessary to confirm this hypothesis, but it seems the most  
281 parsimonious one according to the available evidences.

282

### 283 *The visual performance of mutants*

284         The present work revealed that mutation does not abolish visual input, but  
285 affects light sensitivity threshold. Mutants reared in DD were more sensitive to light  
286 than wild-type bugs, probably because they lack most of the eye screening pigments  
287 and have an intact retina (more photons can stimulate the photoreceptors). When  
288 reared in LD, light exposition damaged some of the photoreceptors located in the  
289 medial regions of the eye (those present along the whole development of bugs). It  
290 should be noted that because new ommatidia are added at the eye periphery at each  
291 molt (Settembrini, 1984), photodamage is more marked in the old medial ommatidia  
292 than for the peripheral ones (not shown). This allows bugs to remain relatively

293 sensitive to light along their life despite the degradation of the oldest ommatidia.  
294 Provided that the number of functional photoreceptors is reduced upon exposition to  
295 light, the sensitivity of LD-reared mutant bugs is nevertheless lower than for the  
296 insects reared in DD.

297 Wild-type bugs also vary in their sensitivity to light as a consequence of the  
298 movement of screening pigments (Reisenman et al., 2002). They are less sensitive  
299 during the photophase than during the scotophase (Reisenman et al., 1998). When  
300 compared to mutants, the strong limitation of photon arrival to the rhabdom exerted  
301 by screening pigments in light-adapted normal eyes (i.e. tested during the  
302 photophase) make these bugs the less sensitive group of insects. Dark-adapted bugs  
303 (i.e. tested during their scotophase), as expected, were more sensitive than light-  
304 adapted ones, but not as sensitive as mutants reared in DD.

305 It should be noted that the daily adaptation of the compound eye of wild bugs  
306 involves two processes, the migration of screening pigments and the axial  
307 displacement of the rhabdom (Reisenman et al. 2002). In red-eye mutants neither  
308 process takes place and, as a consequence, no change in their condition occurs  
309 between the scotophase and the photophase. Two conclusions can be drawn from this  
310 observation. First, no adaptation occurs in the red-eye and, second, the axial  
311 migration of the rhabdom is not driven by its own movement, but by the displacement  
312 from screening pigments present into the retinular cells.

313 This is the first time that the effects of a mutation on the visual system of  
314 hemimetabolous insects are being tested. So far, most work has been done on  
315 holometabolous insects and thus research is restricted to the adult stage only.  
316 Working with hemimetabolous insects offers the possibility to evaluate long-term  
317 effects across developmental instars. Furthermore, most of these studies are purely  
318 descriptive and not manipulative. Despite these differences, however, our results are  
319 consistent with the results found for holometabolous insects. Compound eye of  
320 worker honeybees with snow and laranja mutations (an alteration of tryptophan  
321 metabolism) had an increased sensitivity to light, which was explained by the absence  
322 of any screening pigment (Gribakin and Chesnokova, 1982). Similarly, in the blowfly  
323 *Calliphora erythrocephala*, an important increase in sensitivity was evinced in  
324 mutants lacking screening pigments when compared to normal flies (Streck, 1972).  
325 This is logical as in the eye of flies screening pigments optically isolate adjacent  
326 ommatidia.

327           In the case of *Drosophila*, several studies on the effect of mutations on visual  
328 performance have been published. Visual performance was measured by means of  
329 electroretinogram and phototactic behavior (Broda and Willmund, 1981; Pak, 1995;  
330 Belušič, 2011). Provided the existing diversity of mutations and the fact that in many  
331 cases previous exposition to light was not controlled, it is difficult to discriminate the  
332 relative importance of different parameters, such as lack of pigment, retinal damage,  
333 aging, etc.

334

### 335 *The photo-protector role of the screening pigments*

336           The main function assigned to screening pigments in the compound eyes of  
337 insects is related to vision, i.e. screen out stray light, control the incident light flux at  
338 the photoreceptors, and their angular acceptance (Stavenga, 1989). On the other hand,  
339 in vitro studies revealed that melanin in vertebrates and ommochromes in  
340 invertebrates fulfill the same function as effective inhibitors of free radical induced  
341 by lipid peroxidation, protecting eye structures against UV or bright light-induced  
342 damage (Ostrovsky et al., 1987; Sakina et al., 1987; Meyer-Rochow et al., 2002). In  
343 vivo studies of deep-water living crustacean have shown that the exposition to  
344 illumination ranging from moderate to high produced retinal damage, revealing the  
345 deleterious effect of light (Nilsson and Lindström, 1983). As underlined by Boulton  
346 et al. (2001) “*The retina represents a paradox, in that, while light and oxygen are*  
347 *essential for vision, these conditions also favour the formation of reactive oxygen*  
348 *species leading to photochemical damage to the retina.*” Screening pigments protect  
349 retinal integrity in two ways, first physically, by reducing the light intensity reaching  
350 the photoreceptors and chemically as an antioxidant. However until now this last  
351 function has never been investigated for the screening pigments of the compound  
352 eyes of insects.

353           In the present work we demonstrated the protective role of the screening  
354 pigments in the eyes of triatomine bugs and most likely insects in general. This  
355 assertion is supported by the fact that red-eye mutant bugs, which lack screening  
356 pigments within the retinula cells, presented a highly degraded retina and severe  
357 reduction of visual performance when exposed to light. This degradation became  
358 more severe as the insects aged, i.e. with the cumulative time of light exposure.  
359 Ocelli exhibited no damage, probably due to the fact that their exposition to light is  
360 shorter given their imaginal character.

361 In addition, the hematophagous condition of triatomine insects makes them  
362 particularly interesting. Hematophagous insects ingest large amounts of blood every  
363 meal, the digestion of which produces high concentration of heme. Free heme is a  
364 powerful generator of reactive oxygen species, which damage biological systems  
365 through oxidation of lipids, proteins and DNA (Vincent, 1989). Thus, the eyes of  
366 haematophagous insects are exposed to two type of oxidative stress: the light they  
367 receive and the blood that the insect ingests. Screening pigments seem to be able to  
368 reduce this stress by means of two mechanisms, first by reducing the amount of light  
369 reaching the reticular cells and, second, acting as antioxidant agents. In the present  
370 work we demonstrated that screening pigments play a fundamental role in visual cells  
371 protection against oxidative processes caused by blood feeding and photo-oxidative  
372 stress. This was not only evident in mutants lacking these pigments, but also in wild-  
373 type bugs as highlighted by the increase in screening pigments quantity observed in  
374 the ommatidia of insects exposed to stress factors (Figs. 8C and 9B). This increase  
375 occurred within a single instar, revealing that ommochrome synthesis is independent  
376 of molting and is directly induced by stress in order to maintain the reticular integrity.  
377

378 In conclusion, the eyes of blood-sucking insects are particularly exposed to a  
379 double oxidative stress, which is reduced by the presence and active synthesis of  
380 screening pigments. In the case of triatomines, which are able to obtain blood-meals  
381 reaching more than 10 times the own body weight at each feeding event, we can  
382 speculate that they strong photophobic behavior helps to reduce oxidative stress to  
383 which they are submitted.

384

### 385 **Acknowledgements**

386 Authors are indebted the staff members of our research group at the IRBI for  
387 fruitful discussions, to C. Labrousse for technical support with insect rearing and to  
388 an anonymous reviewer for valuable comments. This work received support from the  
389 CNRS, the University of Tours and the Agence Nationale de la Recherche (ANR-08-  
390 MIE-007, EcoEpi), France.

391

392

### 393 **REFERENCES**

394

- 395 **Belušič, G.** (2011) ERG in *Drosophila*. In Electoretinograms (ed. G. Belušič), pp.  
396 221-238. InTech ([http://www.intechopen.com/articles/show/title/erg-in-](http://www.intechopen.com/articles/show/title/erg-in-drosophila)  
397 [drosophila](http://www.intechopen.com/articles/show/title/erg-in-drosophila))
- 398 **Boulton, M.; Rozanowska, M. and Rozanowska, B.** (2001). Retinal photodamage.  
399 *J. Photochem. Photobiol. B* **64**, 144–161.
- 400 **Broda, H., Willmund, R.** (1981) Fast phototaxis and electoretinograms in red-eyed  
401 and whited-eyed retinal degeneration mutants of *Drosophila melanogaster*. *J.*  
402 *Insect Physiol.* **27**, 789-792.
- 403 **Butenandt, A., Biekert, E., Kübler, H. and Linzen, B.** (1960). Über Ommochrome,  
404 XX. Zur Verbreitung der Ommatine im Tierreich. Neue Methoden zu ihrer  
405 Identifizierung und quantitativen Bestimmung. *H-S. Z. Physiol. Chem.* **319**,  
406 238-256.
- 407 **Caiaffa, C.D., Stiebler, R., Oliveira, M.F., Lara, F.A., Paiva-Silva, G.O. and**  
408 **Oliveira, P.L.** (2010). Sn-protoporphyrin inhibits both heme degradation and  
409 hemozoin formation in *Rhodnius prolixus* midgut. *Insect Biochem. Molec.* **40**,  
410 855–860.
- 411 **Dontsov, A. E., Fedorovich, I. B., Lindström, M. and Ostrovsky, M. A.** (1999).  
412 Comparative study of spectral and antioxidant properties of pigments from the  
413 eyes of two *Mysis relicta* (Crustacea, Mysidacea) populations, with the  
414 different light damage resistance. *J. Comp. Physiol. B* **169**, 157-164.
- 415 **Graça-Souza, A. V., Maya-Monteiro, C., Paiva-Silva, G. O., Braz, G. R. C., Paes,**  
416 **M. C., Sorgine, M. H. F., Oliveira, M. F. and Oliveira, P. L.** (2006).  
417 Adaptations against heme toxicity in blood-feeding arthropods. *Insect*  
418 *Biochem. Molec.* **36**, 322-335.
- 419 **Gribakin, F. G. and Chesnokova, E. G.** (1982) Changes in functional  
420 characteristics of the compound eye of bees caused by mutations disturbing  
421 tryptophan metabolism. *Neurophysiology* **14**, 57-62.
- 422 **Hotta, Y. and Benzer, S.** (1969). Abnormal Electoretinograms in Visual Mutants of  
423 *Drosophila*. *Nature* **222**, 354-356.
- 424 **Insausti, T.C. and Lazzari, C.R.** (2002). The fine structure of ocelli of *Triatoma*  
425 *infestans* (Hemiptera:Reduviidae). *Tissue Cell* **34**, 437-449.
- 426 **Langer, H.** (1960). Über den chemischen Aufbau des Facettenauges von *Calliphora*  
427 *erythrocephala* Meig. und seine Veränderungen mit dem Imaginalalter. *Z.*  
428 *vergl. Physiol.* **42**, 595-626

- 429 **Langer, H.** (1975). Properties and functions of screening pigments in insects eyes. In  
430 *Photoreceptor optics* (ed. A. W. Snyder and R. Menzel), pp. 429-455. Berlin  
431 and New York: Springer-Verlag.
- 432 **Lazzari, C.R., Reisenman, C.E. and Insausti, T.C.** (1998). The role of the ocelli in  
433 the phototactic response of *Triatoma infestans* (Heteroptera:Reduviidae). *J.*  
434 *Insect Physiol.* **44**, 1159-1162.
- 435 **Lazzari, C. R.; Fischbein, D. and Insausti, T. C.** (2012). Differential control of  
436 light–dark adaptation in the ocelli and compound eyes of *Triatoma infestans*.  
437 *J. Ins. Physiol.* **57**, 15454-1552.
- 438 **Linzen, B.** (1967). Zur Biochemie der Ommochrome. *Naturwissenschaften* **11**, 259-  
439 267.
- 440 **Linzen, B.** (1974). The tryptophan → ommochrome pathway in insects. In *Advances*  
441 *in Insect Physiology*, vol. 10 (ed. J. E. Treherne, M. J. Berridge and V. B.  
442 Wigglesworth), pp. 117-246. London and New York: Academic Press.
- 443 **Meyer-Rochow, V.B.** (1994). Light-induced damage to photoreceptors of spiny  
444 lobsters and other crustaceans. *Crustaceana* **1**, 95-109.
- 445 **Meyer-Rochow V.B., T. Kashiwagi and E. Eguchi**, 2002. Selective photoreceptor  
446 damage in four species of insects induced by experimental exposures to UV-  
447 irradiation. *Micron*, 33: 23-31.
- 448 **Moraes, A. S., Pimentel, E. R., Rodrigues, V. L. C. C and Mello, M. L. S.** (2005).  
449 Eye pigments of the blood-sucking insect, *Triatoma infestans* klug  
450 (Hemiptera, Reduviidae). *Braz. J. Biol.* **65**, 477-481.
- 451 **Müller, von J.** (1970). Feinbau und Dunkelanpassung der Komplexaugen von  
452 *Rhodnius prolixus* (Stal). *Zool. Jb. Physiol.* **75**, 111–133.
- 453 **Nilsson, H. L. and Lindström, M.** (1983). Retinal damage and sensitivity loss of a  
454 light-sensitive crustacean compound eye (*Cirolana borealis*): electron  
455 microscopy and electrophysiology. *J. Exp. Biol.* **107**, 277-292.
- 456 **Núñez, J.A. and Lazzari, C.R.** (1990). Rearing of *Triatoma infestans* Klug (Het,  
457 Reduviidae) in the absence of a live host. I. Some factors affecting the  
458 artificial feeding. *J. Appl. Entomol.*, **109**, 87–92.
- 459 **Ostrovsky, M. A., Sakina, N. L. and Dontsov, A. E.** (1987). An antioxidative role  
460 of ocular screening pigments. *Vision Res.* **27(6)**, 893-899.
- 461 **Pak, W.L.** (1995). *Drosophila* in vision research. The Friedenwald Lecture.  
462 *Investigative Ophthalmolgy and Visual Science* **36**, 2340-2357.

- 463 **Pires, H.H., Abrao, D.O., Machado, E.M., Schofield, C.J. and Diotaiuti, L.**  
464 (2002) Eye colour as a genetic marker for fertility and fecundity of *Triatoma*  
465 *infestans* (Klug, 1834) Hemiptera, Reduviidae, Triatominae. *Mem. Inst.*  
466 *Oswaldo Cruz.* **97**: 675-678.
- 467 **Reisenman, C.E., Lazzari, C.R. and Giurfa, M.** (1998). Circadian control of  
468 photonegative sensitivity in the haematophagous bug *Triatoma infestans*. *J.*  
469 *Comp. Physiol.* **183**, 533-541.
- 470 **Reisenman, C.E., Insausti, T.C. and Lazzari, C.R.** (2002). Light-induced and  
471 circadian changes in the compound eye of the haematophagous bug *Triatoma*  
472 *infestans* (Hemiptera: Reduviidae). *J. Exp. Biol.* **205**, 201-210.
- 473 **Ribi, W.A.** (1987). A Handbook in Biological Electron Microscopy, pp. 106,  
474 Switzerland: Ribi, W.
- 475 **Sakina, N. L., Dontsov, A. E., Lapina, V. A. and Ostrovsky, M. A.** (1987).  
476 Protective system of eye structures from photoinjury. II. Screening pigments  
477 of arthropods (ommochromes) as inhibitors of photooxidative processes. *J.*  
478 *Evol. Biochem. Physiol.* **23**, 702-706.
- 479 **Settembrini, B. P.** (1984). The compound eyes of *Triatoma infestans* and *Rhodnius*  
480 *prolixus* (Hemiptera: Reduviidae). *J. Med. Entomol.* **21**, 477-479.
- 481 **Stavenga, D.G.,** (1989). Pigments in compounds eyes, in: Stavenga, D.G., Hardie,  
482 R.C. (Eds.), Facets of Vision, Berlin: Springer Verlag, pp. 152-172.
- 483 **Stiebler, R., Timm, B. L., Oliveira, P. L., Hearne, G. R., Egan, T. J. and**  
484 **Oliveira, M. F.** (2010). On the physico-chemical and physiological  
485 requirements of hemozoin formation promoted by perimicrovillar membranes in  
486 *Rhodniusprolixus* midgut. *Insect Biochem. Molec.* **40**, 284–292.
- 487 **Streck, P.** (1972). Der Einfluss des Schirmpigmentes auf das Sehfeld einzelner  
488 Sehzellen der Fliege *Calliphora erythrocephala* Meig. *Z. Verg. Physiol.* **76**,  
489 372-402.
- 490 **Summers, K. M., Howells, A. J. and Pylotis, N. A.** (1982). Biology of eye  
491 pigmentation in insects. *Adv. Insect Physiol.* **16**, 119–166.
- 492 **Vincent, S.H.** (1989). Oxidative effects of haem and porphyrins on proteins and  
493 lipids. *Semin. Hematol.* **26**, 105–113.
- 494  
495  
496

497 **FIGURE CAPTIONS**

498

499 **Figure 1.** Head of *Triatoma infestans* (A, B) and *Rhodnius prolixus* (C, D) in lateral  
500 view. **A, C:** wild type. **B, D:** red-eye mutant. The right ocellus (short arrow) and  
501 compound eye (long arrow) are shown. Scale bars: 300  $\mu\text{m}$ .

502

503 **Figure 2.** Light micrographs of longitudinal sections through the compound eyes of  
504 the recently hatched first larval stage of *Triatoma infestans*. **A:** wild type. **B:** red-eye  
505 mutant. C, cornea; Cc, crystalline cone; PPC, primary pigment cell; rh, rhabdomere;  
506 Rp, retinal pigment; SPC, secondary pigment cell; 1-8 indicate the retinula cell  
507 number. Scale bars: 50  $\mu\text{m}$ .

508

509 **Figure 3.** Light micrographs of longitudinal sections through the compound eyes of  
510 the fourth larval stage of *Triatoma infestans*. **A:** wild type. **B:** red-eye mutant reared  
511 in DD conditions, showing the intact structure of the retina. **C:** red-eye mutant reared  
512 in LD conditions. The partial damage of the retinal structure is evident already. C,  
513 cornea; Cc, crystalline cone; PPC, primary pigment cell; rh, rhabdomere; Rp, retinal  
514 pigment; SPC, secondary pigment cell; 1-8 indicate the retinula cell number. Scale  
515 bars: 30  $\mu\text{m}$ .

516

517 **Figure 4.** Light micrographs of sections through the compound eyes of adult stage of  
518 *Triatoma infestans*. **A:** wild type, longitudinal section. **B:** wild type, cross section. **C:**  
519 longitudinal section of red-eye mutant reared in DD conditions showing the intact  
520 structure of the retina. **D:** cross section of red-eye of the same individual in C. **E:**  
521 longitudinal section of red-eye mutant reared in LD conditions. **F:** idem E, cross  
522 section. Note in E and F the significant damage of the retina. C, cornea; Cc,  
523 crystalline cone; PPC, primary pigment cell; rh, rhabdomere; Rp, retinal pigment;  
524 SPC, secondary pigment cell; 1-8 indicate the retinula cell number. Scale bars: 30  
525  $\mu\text{m}$ .

526

527 **Figure 5.** Light micrographs of sections through the ocellus of *Triatoma infestans*  
528 recently emerged to adult stage, reared in LD conditions. **A:** wild type. **B:** red-eye  
529 mutant. As a new structure, the ocellus shows no damage, as compared with the  
530 retina of the compound eye of the same individual (Fig. 4E, F). Scale bars: 100  $\mu\text{m}$ .



531

532 **Figure 6.** Phototactic sensitivity of wild-type and red-eyes mutants of *Triatoma*  
533 *infestans*. Provided that the migration of screening pigments modulates the sensitivity  
534 to light of wild-type bugs, they were tested during the scotophase and during the  
535 photophase. Mutants do not experience adaptation, because of the lack of those  
536 pigments, but their exposition to light produce retinal photodamage. LD, bugs kept  
537 under a light/dark cycle; DD bugs maintained in constant darkness.

538

539 **Figure 7.** Light micrographs of sections through the compound eyes of fifth-instar  
540 larvae of *Rhodnius prolixus*. **A:** wild type, longitudinal section. **B:** wild type, cross  
541 section. **C:** unfed red-eye mutant reared in permanent darkness (longitudinal section),  
542 showing the intact structure of the retina. **D:** idem as C in cross section. C, cornea;  
543 Cc, crystalline cone; PPC, primary pigment cell; rh, rhabdomere; Rp, retinal pigment;  
544 SPC, secondary pigment cell; 1-8 indicate the retinula cell number. Scale bars: 30  
545  $\mu\text{m}$ .

546

547 **Figure 8.** Light micrographs of sections through the compound eyes of fifth-instar  
548 larvae of *Rhodnius prolixus* exposed two weeks to UV light. **A:** unfed red-eye  
549 mutant. **B:** fed red-eyes mutant. **C:** unfed wild type insect. **D:** feed wild type insect.  
550 The structure of the retina of unfed red-eyes mutants (A) as well as that of unfed (C)  
551 and fed (D) wild type insects is conserved. On the other hand, the signs of damage in  
552 the retina of the fed red-eyes mutants (B) are evident. C, cornea; Cc, crystalline cone;  
553 PPC, primary pigment cell; rh, rhabdomere; Rp, retinal pigment; SPC, secondary  
554 pigment cell; 1-8 indicate the retinula cell number. Scale bars: 30  $\mu\text{m}$ .

555

556 **Figure 9.** Light micrographs of sections through the compound eyes of unfed fifth-  
557 instar larvae of *Rhodnius prolixus* exposed 1 month to UV light. **A:** red-eye mutant  
558 showing the damaged retina. **B:** wild type insects, note the large density of screening  
559 pigment granules. Scale bars: 30  $\mu\text{m}$ .

560

561

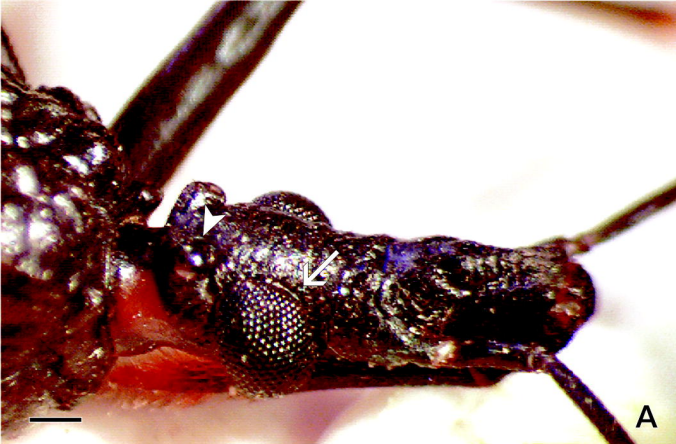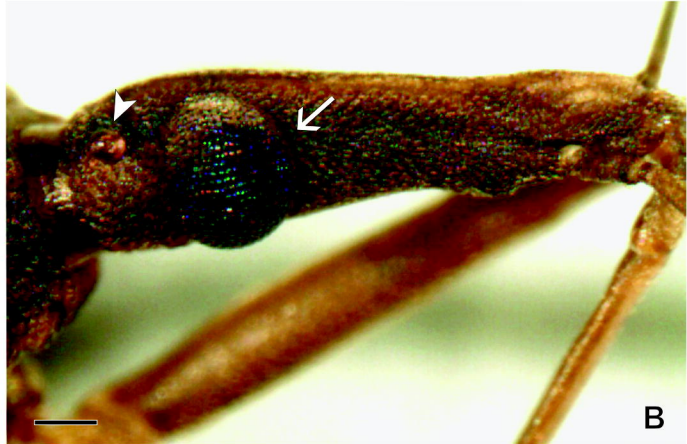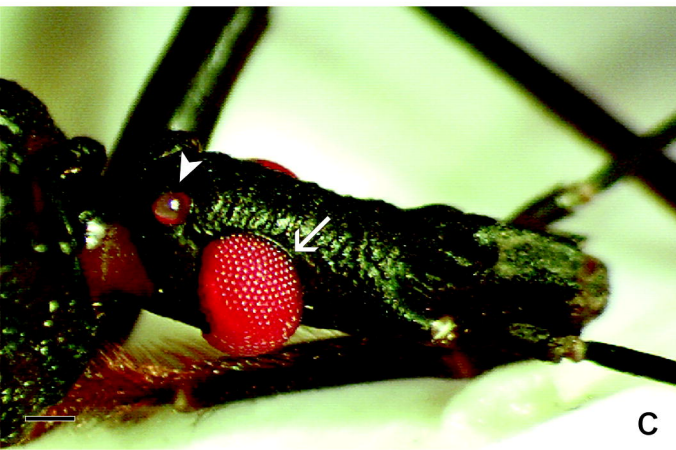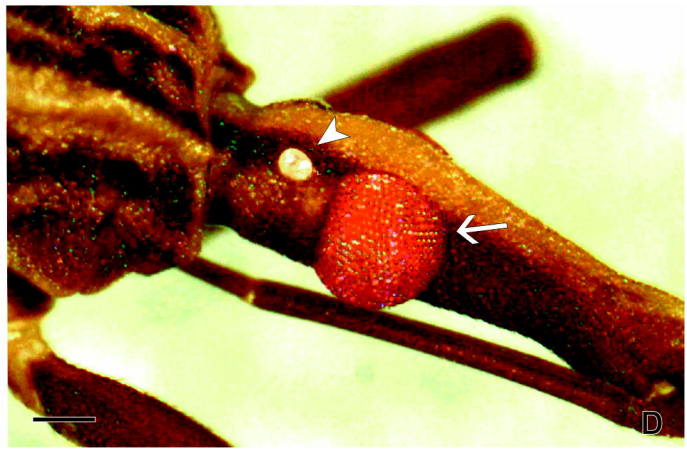

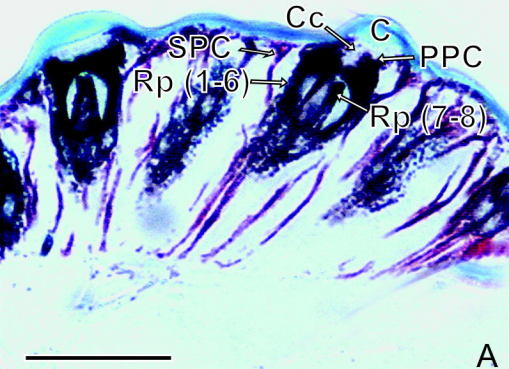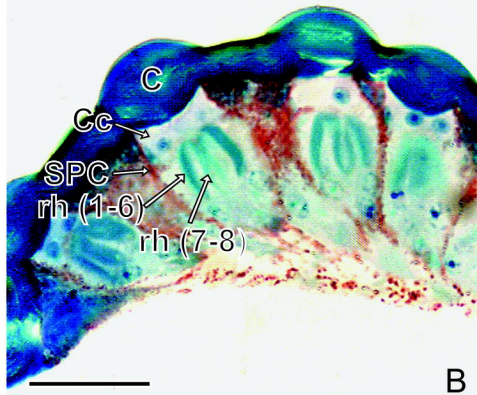

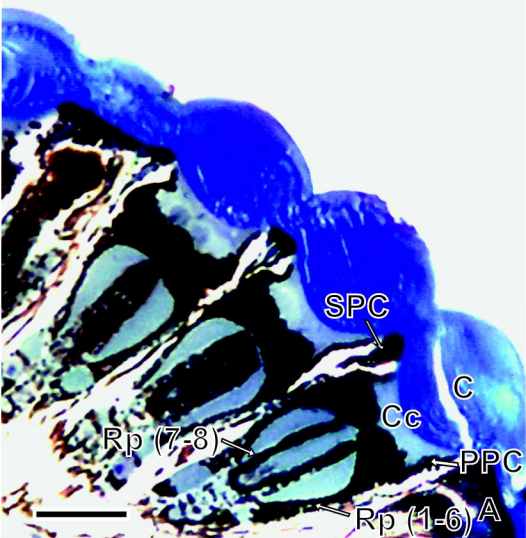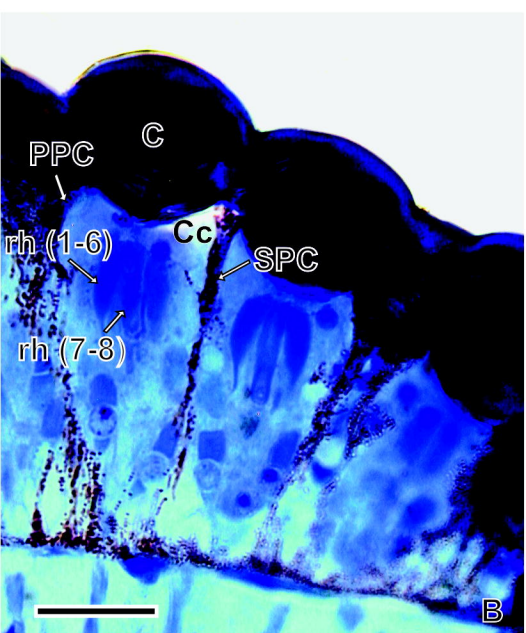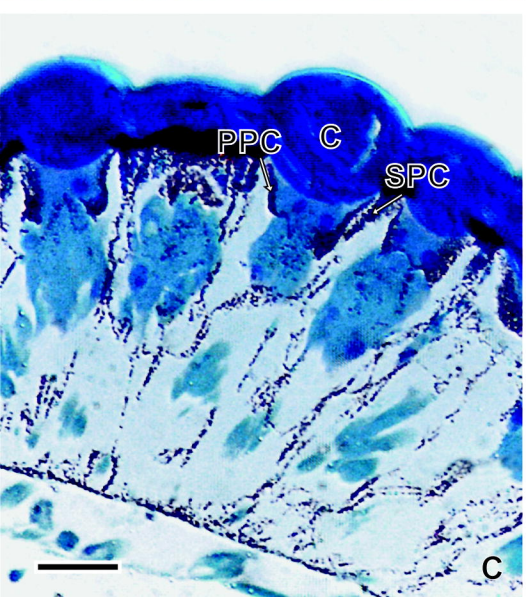

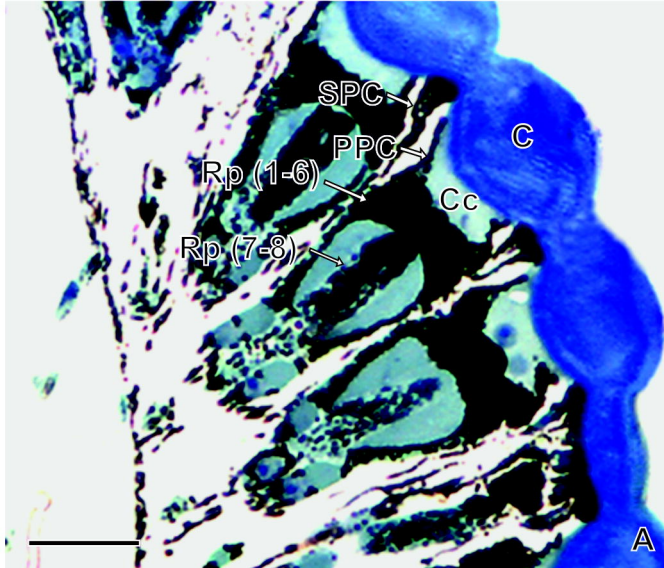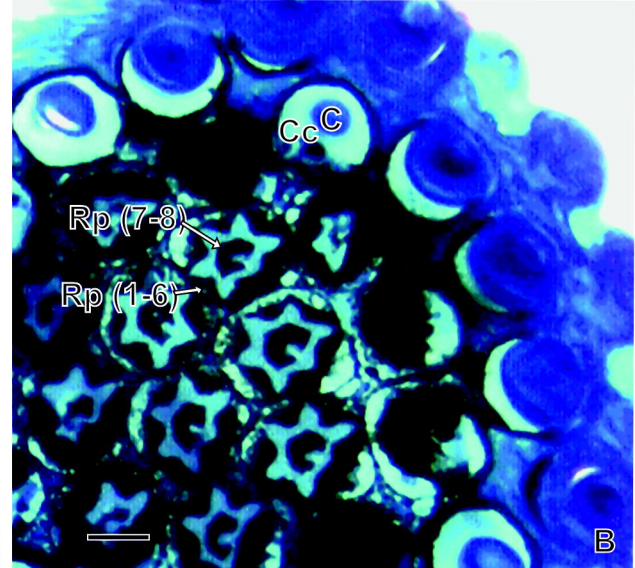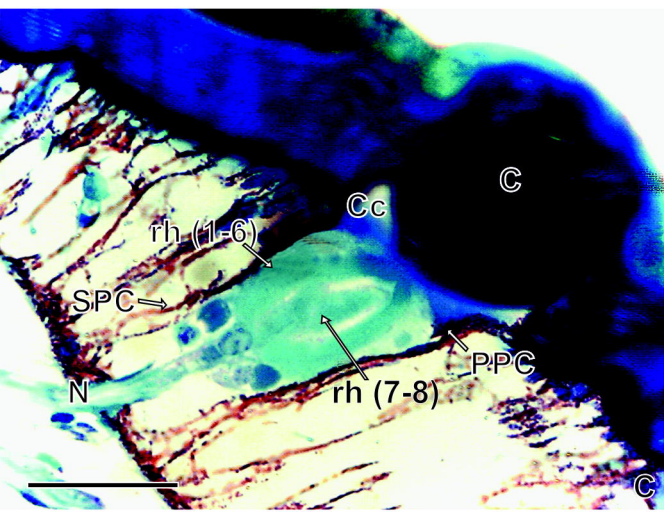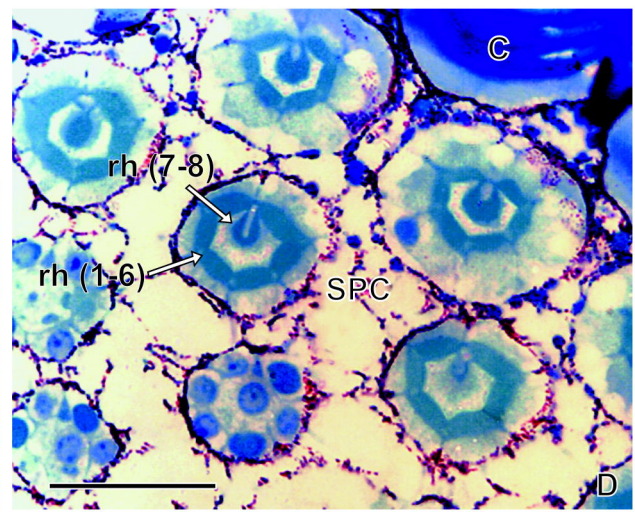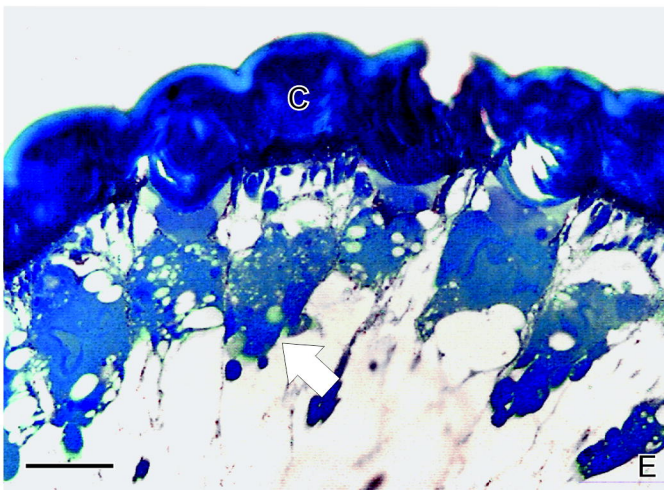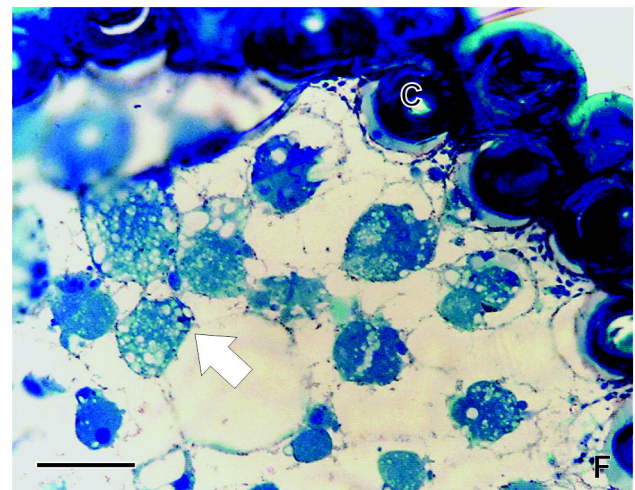

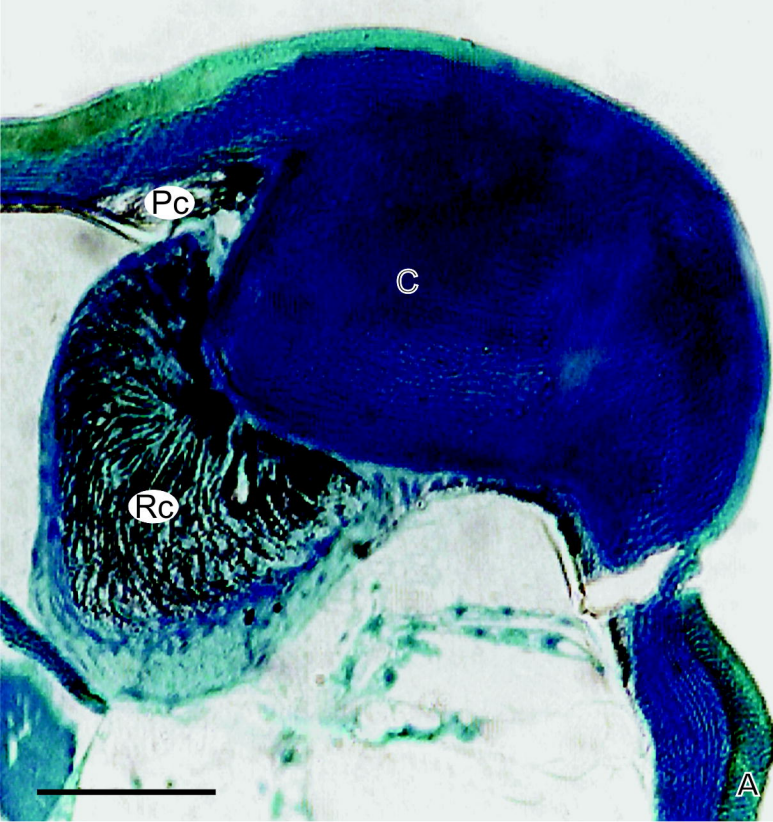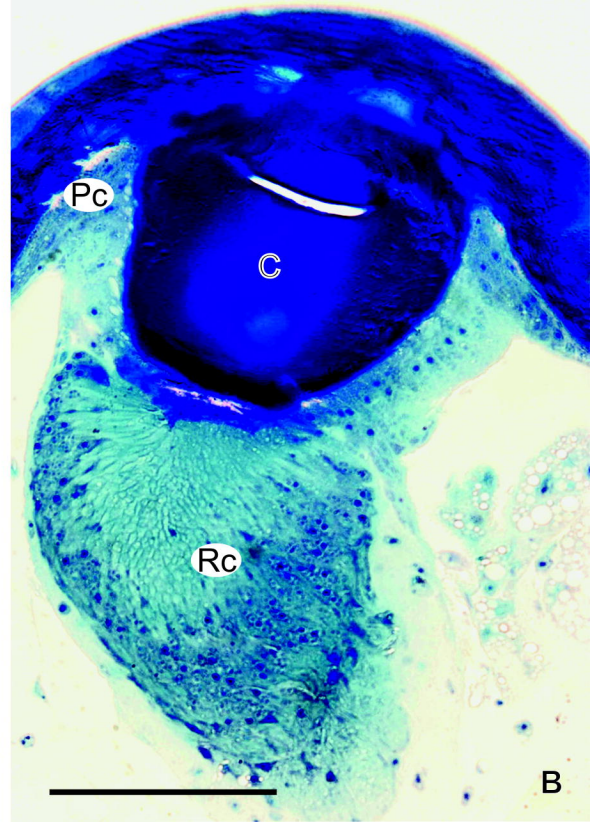

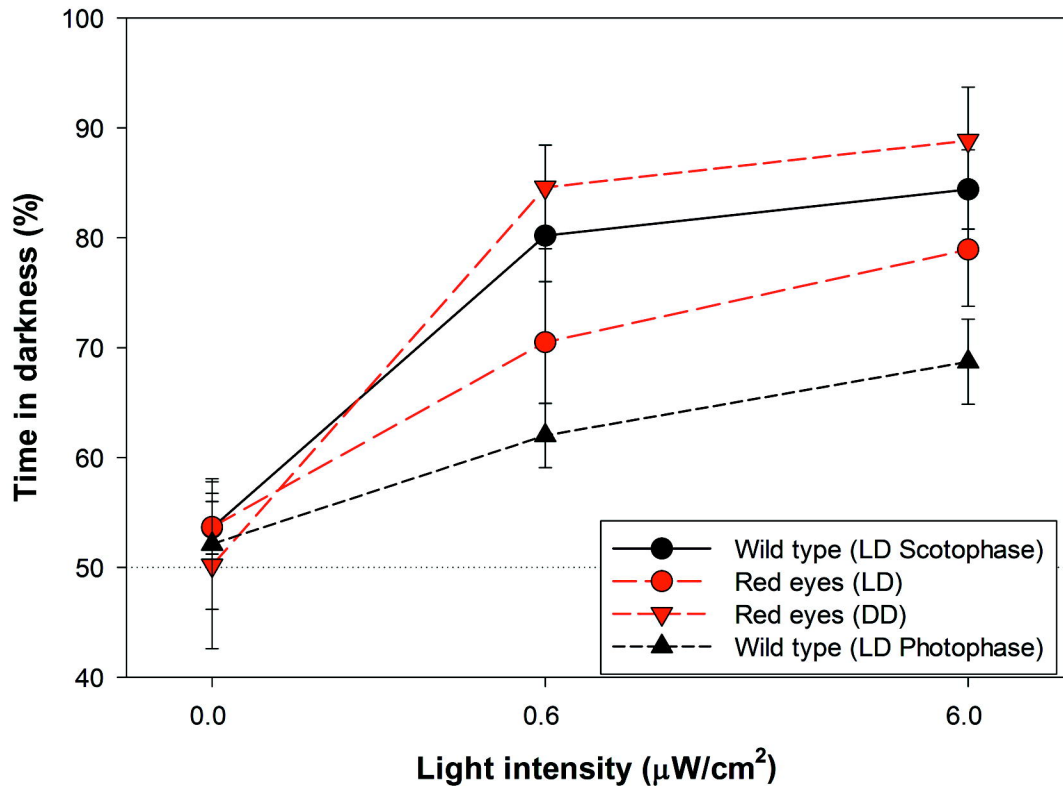

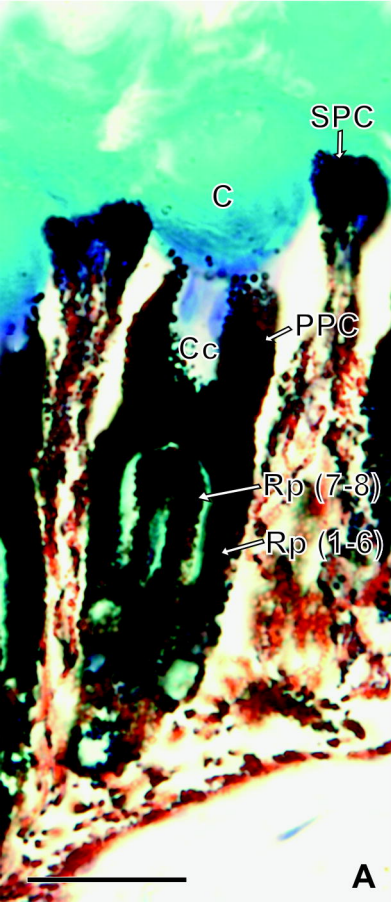

A

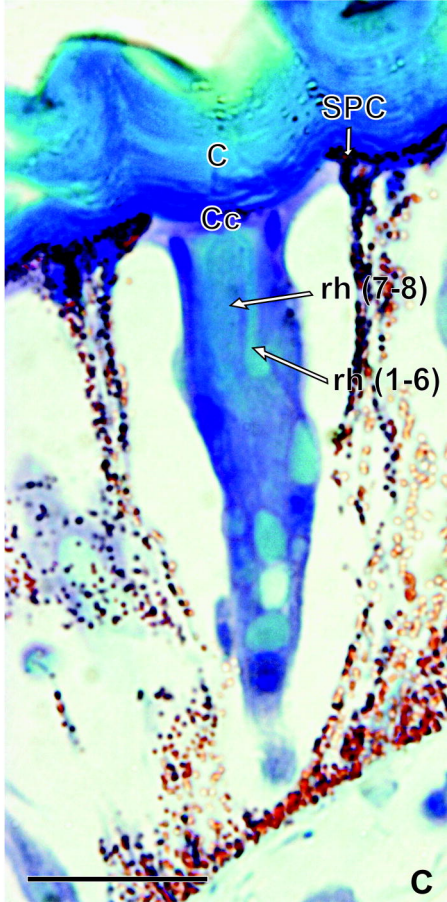

C

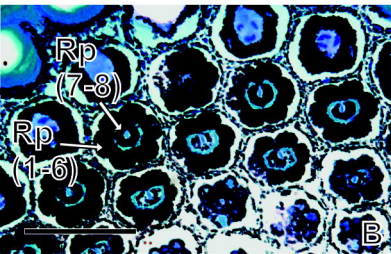

B

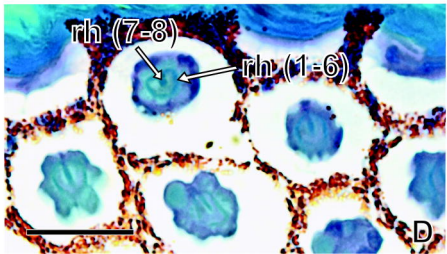

D



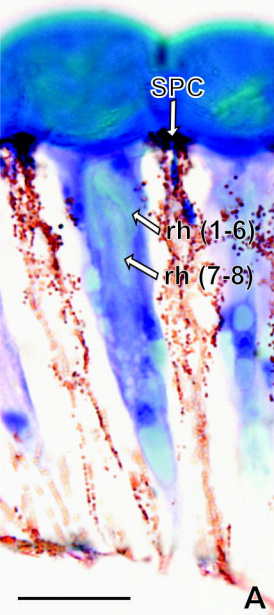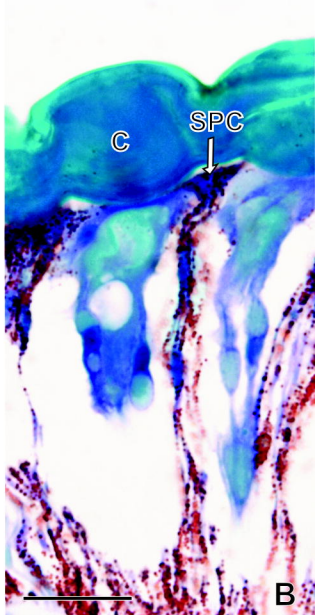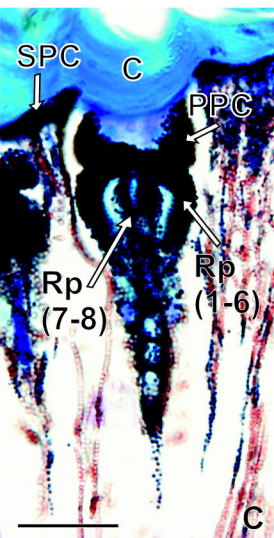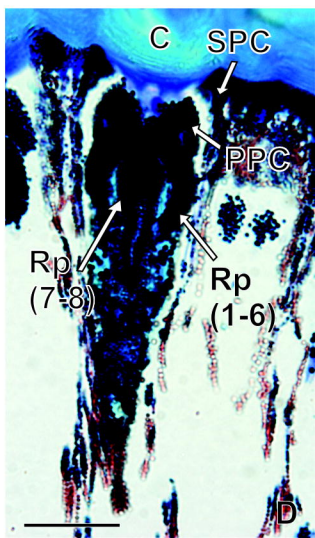

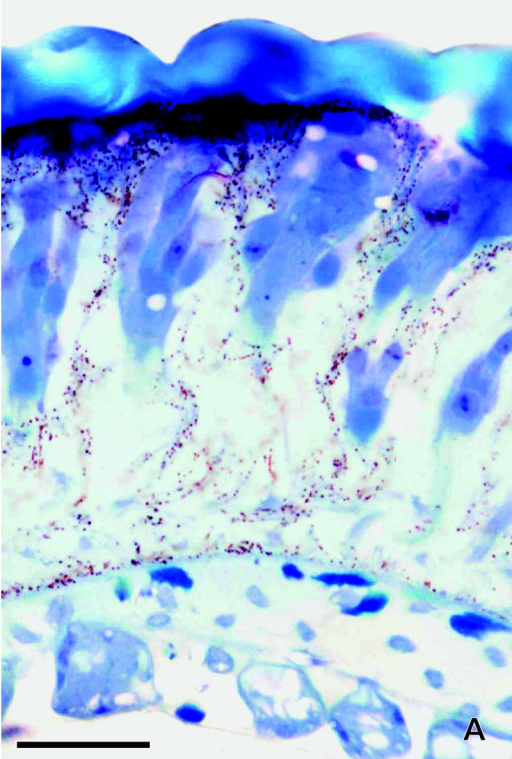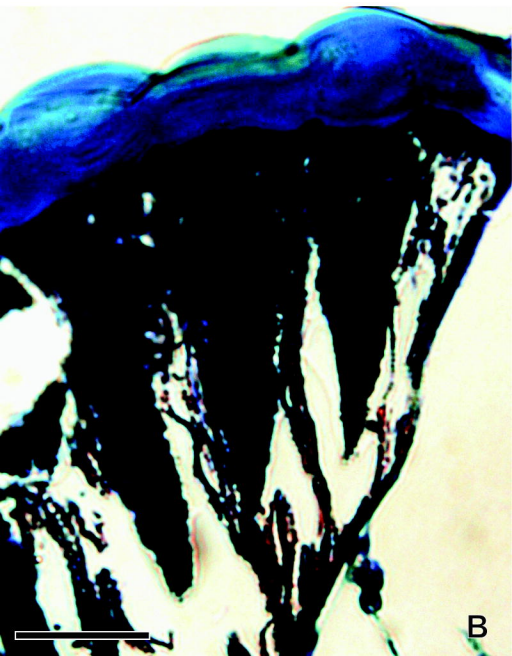

Source: https://cob.silverchair.com/jeb/article-pdf/doi/10.1242/jeb.082818/2036732/jeb_082818.pdf
